# Supplementary material for: Oxysterol levels and metabolism in the course of neuroinflammation: insights from in vitro and in vivo models
Source: PubMed Central journal article supplement (PMC5845224; doi:10.1186/s12974-018-1114-8), 2018-03-09
Supplement: 12974_2018_1114_MOESM1_ESM.pdf [file 12974_2018_1114_MOESM1_ESM.pdf]

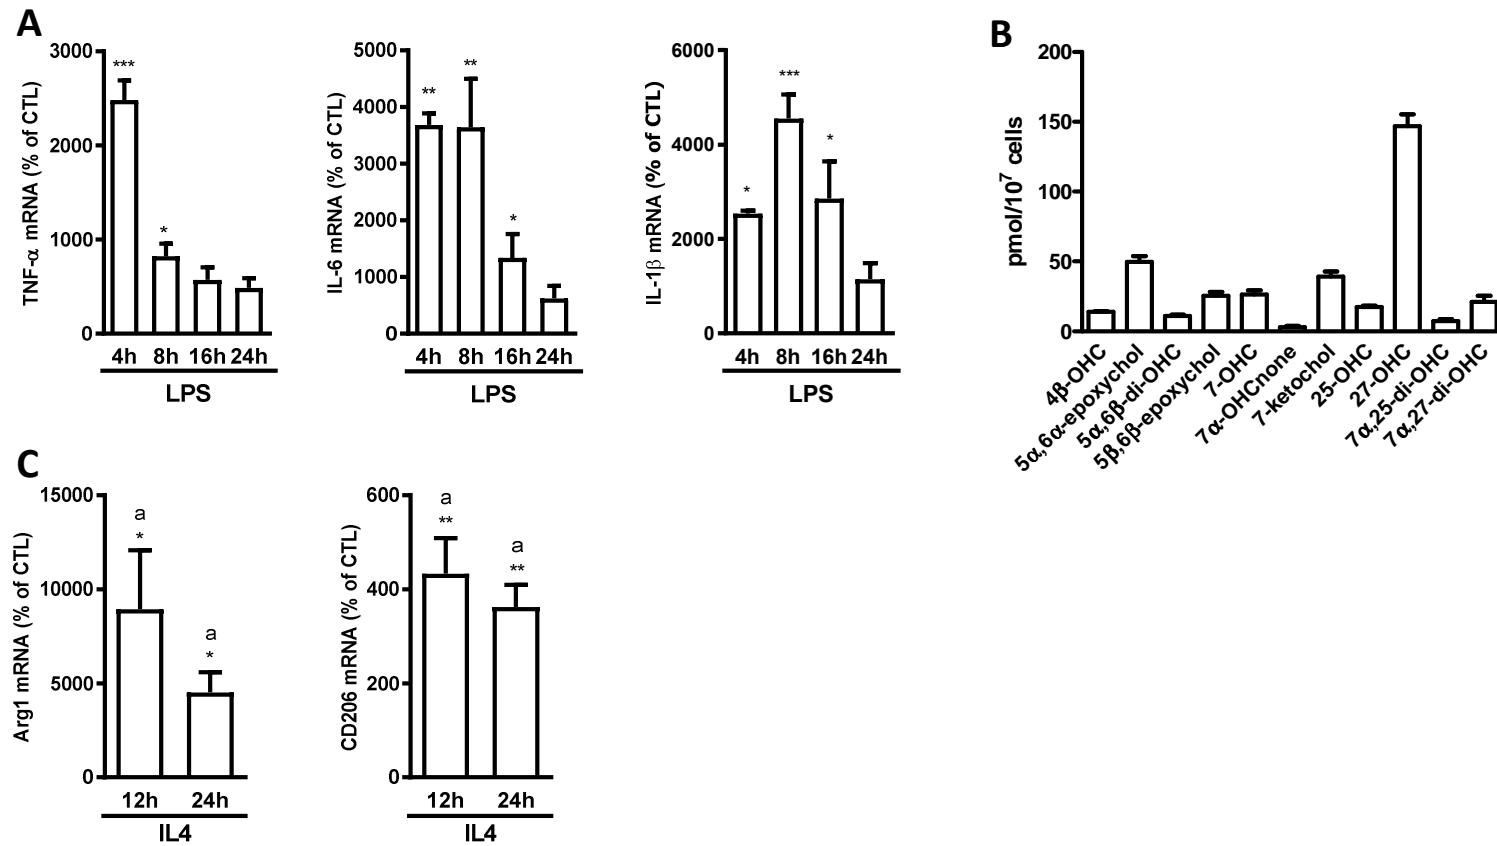

**Supplementary figure 1: Activation of BV2 cells and oxysterol levels in control BV2 cells**

**(A)**  $2,5 \times 10^5$  cells were incubated with vehicle (CTL) or LPS (100 ng/mL) for the indicated time points. mRNA was extracted and RT-qPCR performed for IL-1 $\beta$ , IL-6 and TNF-1 $\alpha$ . Data are expressed as the mean  $\pm$  S.E.M in % of the respective CTL. \*\*\*  $p < 0,001$ ; \*\*  $p < 0,01$ ; \*  $p < 0,05$  vs CTL. **(B)** Oxysterols were quantified in BV2 cells incubated without LPS. Data are expressed as the mean  $\pm$  S.E.M in pmol/10<sup>7</sup> cells. **(C)**  $2,5 \times 10^5$  cells were incubated with vehicle (CTL) or 10 U/mL of IL-4 for the indicated time points. mRNA was extracted and RT-qPCR performed for Arg1 and CD206. Data are expressed as the mean  $\pm$  S.E.M in % of the respective CTL.

**A**

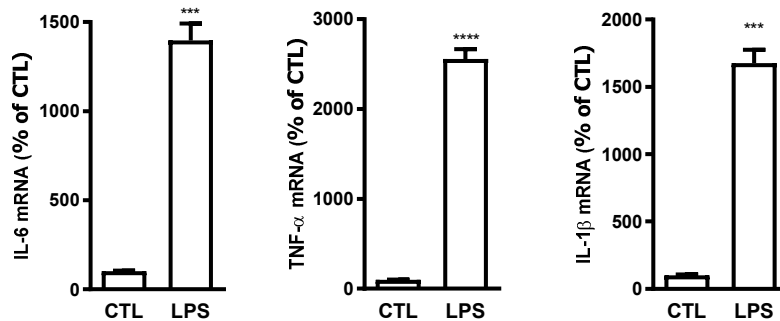

**B**

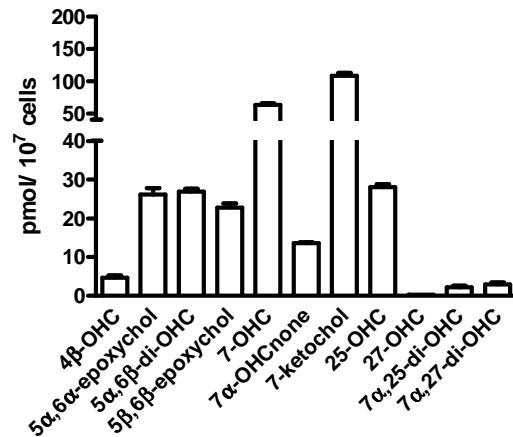

**Supplementary Figure 2: LPS-induced activation of primary co-culture of astrocytes and microglia and oxysterol levels in control cells**

**(A)**  $2.5 \times 10^5$  cells were incubated with LPS (100 ng/mL) or vehicle (CTL) for 8 hours. mRNA was extracted and RT-qPCR performed for IL-1 $\beta$ , IL-6 and TNF- $\alpha$ . Data are expressed as mean  $\pm$  S.E.M in % of CTL. \*\*\*\*  $p < 0,0001$ ; \*\*\*  $p < 0,001$  vs CTL. **(B)** Oxysterols were quantified in co-culture of primary microglia and astrocytes incubated without LPS. Data are expressed as the mean  $\pm$  S.E.M in pmol/10<sup>7</sup> cells.

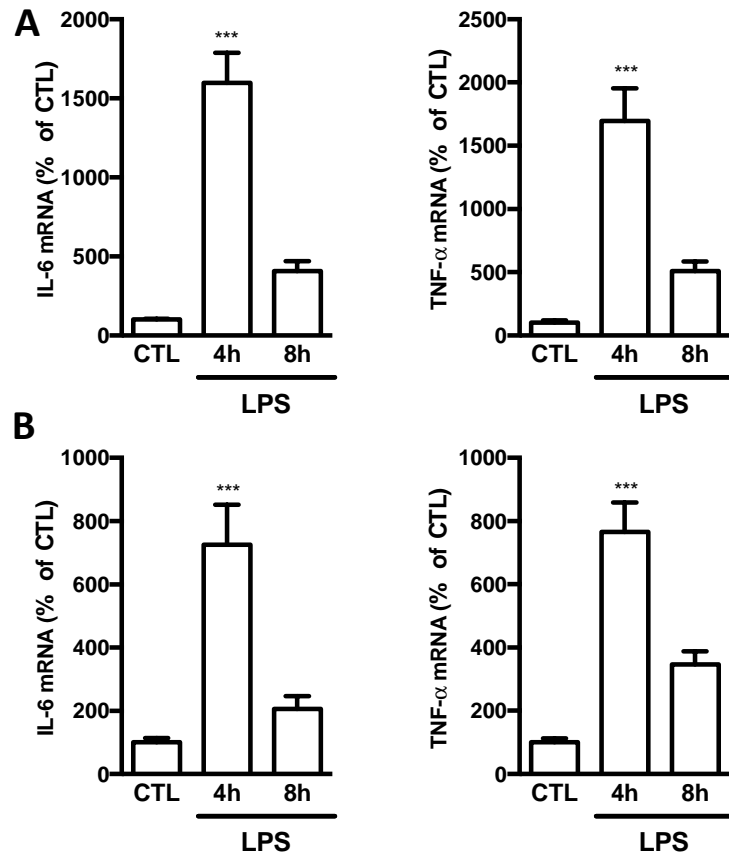

**Supplementary Figure 3: mRNA expression of pro-inflammatory markers in (A) the brain and (B) spinal cord of mice with LPS-induced inflammation in comparison to control mice.** Mice (7 per group) were treated with LPS (300  $\mu$ g/kg) or vehicle (CTL) and sacrificed after 4 or 8 hours. mRNA was extracted and RT-qPCR was performed for IL-6 and TNF- $\alpha$ . Data are expressed as the mean  $\pm$  S.E.M in % of CTL set at 100. \*\*\*  $p < 0,001$  vs CTL.

Mutemberezi et al. Oxysterol levels and metabolism in the course of neuroinflammation: insights from in-vitro and in-vivo models

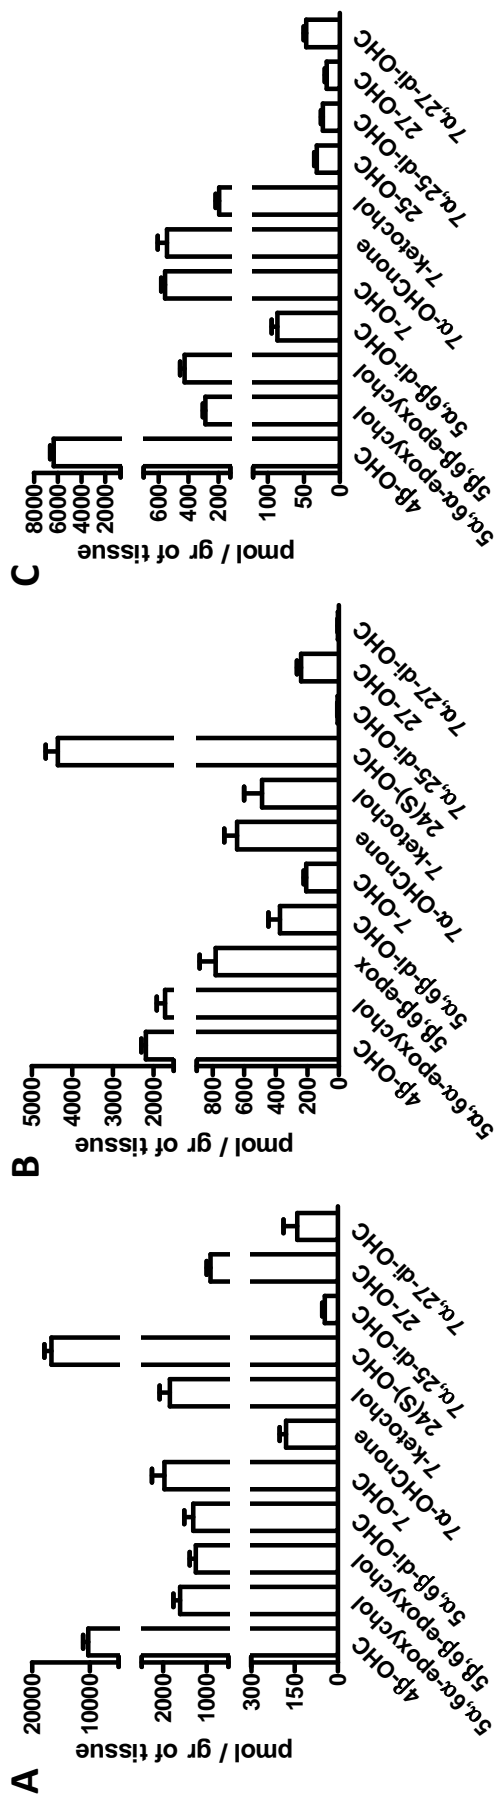

**Supplementary Figure 4: Oxysterol levels in CTL mice.** Oxysterols were analysed in 7 control mice, in the brain (A), the spinal cord (B) and the liver (C). Data are expressed as the mean  $\pm$  S.E.M in pmol / gram of tissue.

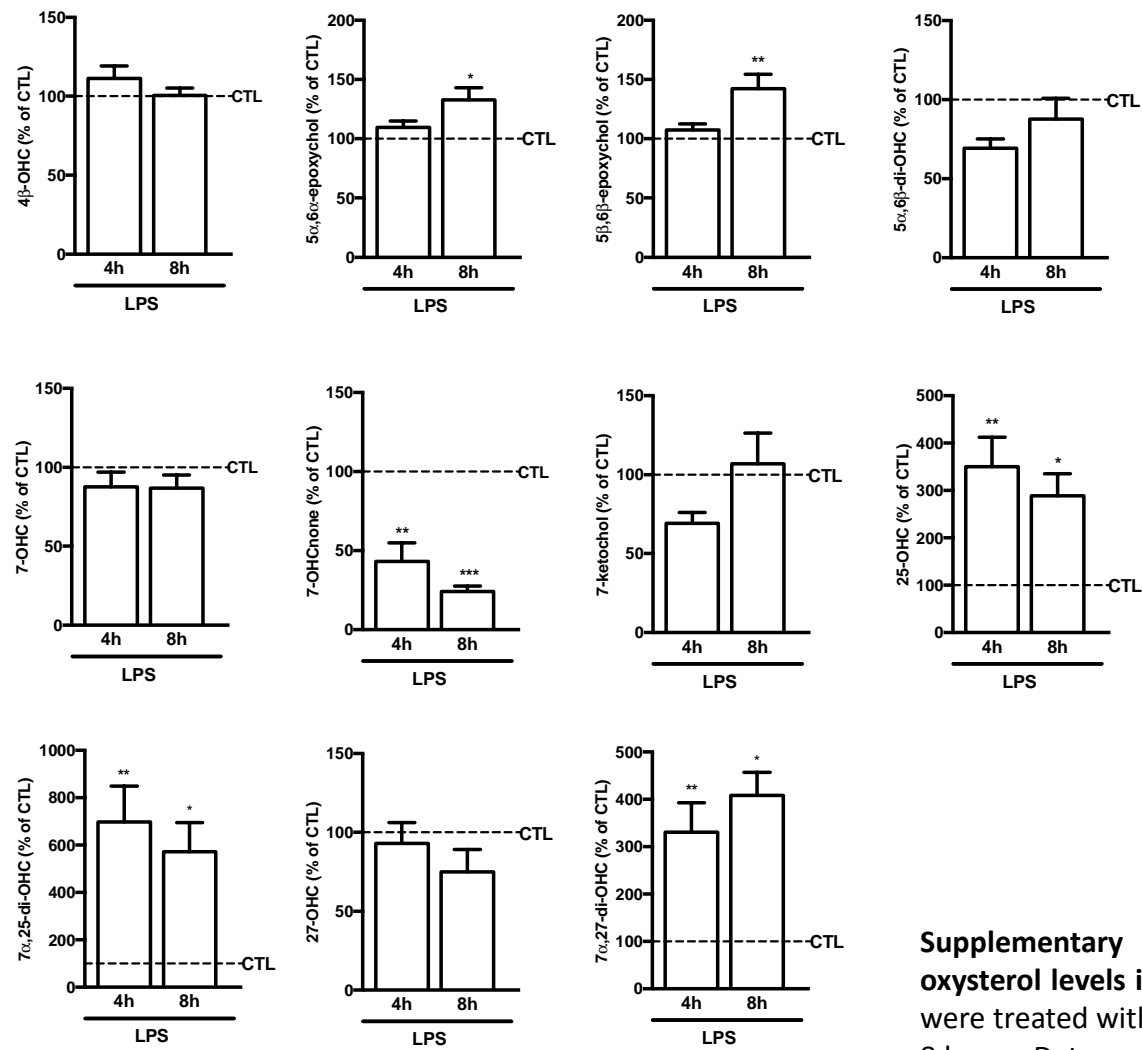

**Supplementary Figure 5: Effect of LPS-induced inflammation on oxysterol levels in the liver in comparison to CTL mice.** 7 mice per group were treated with LPS (300  $\mu$ g/kg) or vehicle (CTL) and sacrificed after 4 or 8 hours. Data are expressed as mean  $\pm$  S.E.M in % of CTL. \*\* p < 0,01 \* p < 0,05 vs CTL.
